# Supplementary material
Source: PubMed Central journal article supplement (PMC5995583)
Supplement: NIHMS969081-supplement-7.pdf [file NIHMS969081-supplement-7.pdf]

**Table S1. CryoEM Data Collection and Processing Statistics, Related to Figure 1**

|                                          | DNA-bound telomerase<br>(EMD-7821) | DNA-free<br>telomerase<br>(EMD-7820) |
|------------------------------------------|------------------------------------|--------------------------------------|
| Magnification                            | 36,764×                            | 36,764×                              |
| Voltage (kV)                             | 300                                | 300                                  |
| Electron exposure ( $e^-/\text{\AA}^2$ ) | 52                                 | 52                                   |
| Defocus range ( $\mu\text{m}$ )          | -1.7 to -4.1                       | -1.8 to -5.3                         |
| Pixel size ( $\text{\AA}$ )              | 1.36                               | 1.36                                 |
| Symmetry imposed                         | C1                                 | C1                                   |
| Initial particle images (no.)            | 3,200,000                          | 2,300,000                            |
| Final particle images (no.)              | 52,506                             | 123,684                              |
| Map resolution ( $\text{\AA}$ )          | 4.8                                | 6.4                                  |
| FSC threshold                            | 0.143                              | 0.143                                |
| Map resolution range ( $\text{\AA}$ )    | 4.0 – 8.0                          | 5.5 – 9.0                            |

**Table S2. Model Refinement and Validation Statistics, Related to Figure 1**

|                        | DNA-bound<br>telomerase<br>(PDB 6D6V) |
|------------------------|---------------------------------------|
| $CC_{\text{mask}}$     | 0.8021                                |
| R.m.s. deviations      |                                       |
| Bond lengths (Å)       | 0.013                                 |
| Bond angles (°)        | 1.691                                 |
| Ramachandran plot      |                                       |
| Favored (%)            | 83.87                                 |
| Allowed (%)            | 16.43                                 |
| Disallowed (%)         | 0.70                                  |
| Rotamer outliers (%)   | 0.82                                  |
| MolProbity score       | 2.53                                  |
| Clashscore             | 22.20                                 |
| $C_{\beta}$ deviations | 0                                     |
