# Supplementary material
Source: PubMed Central journal article supplement (PMC5995583)

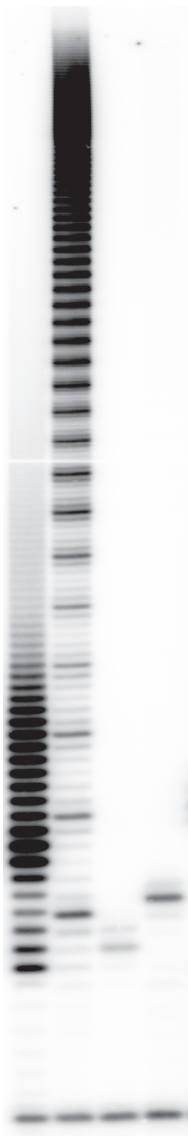

RC

1

2

3

4

Supplement: NIHMS969081-supplement-1.pdf [file NIHMS969081-supplement-1.pdf]

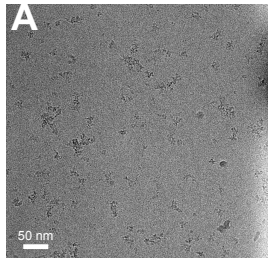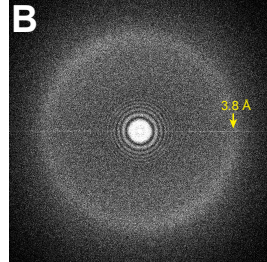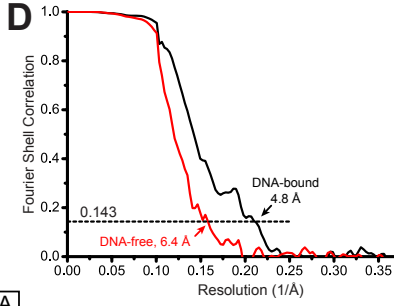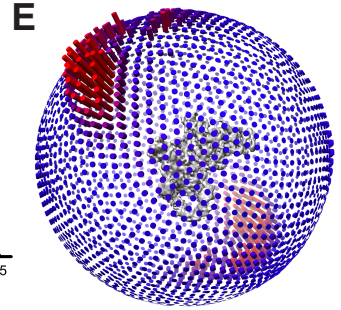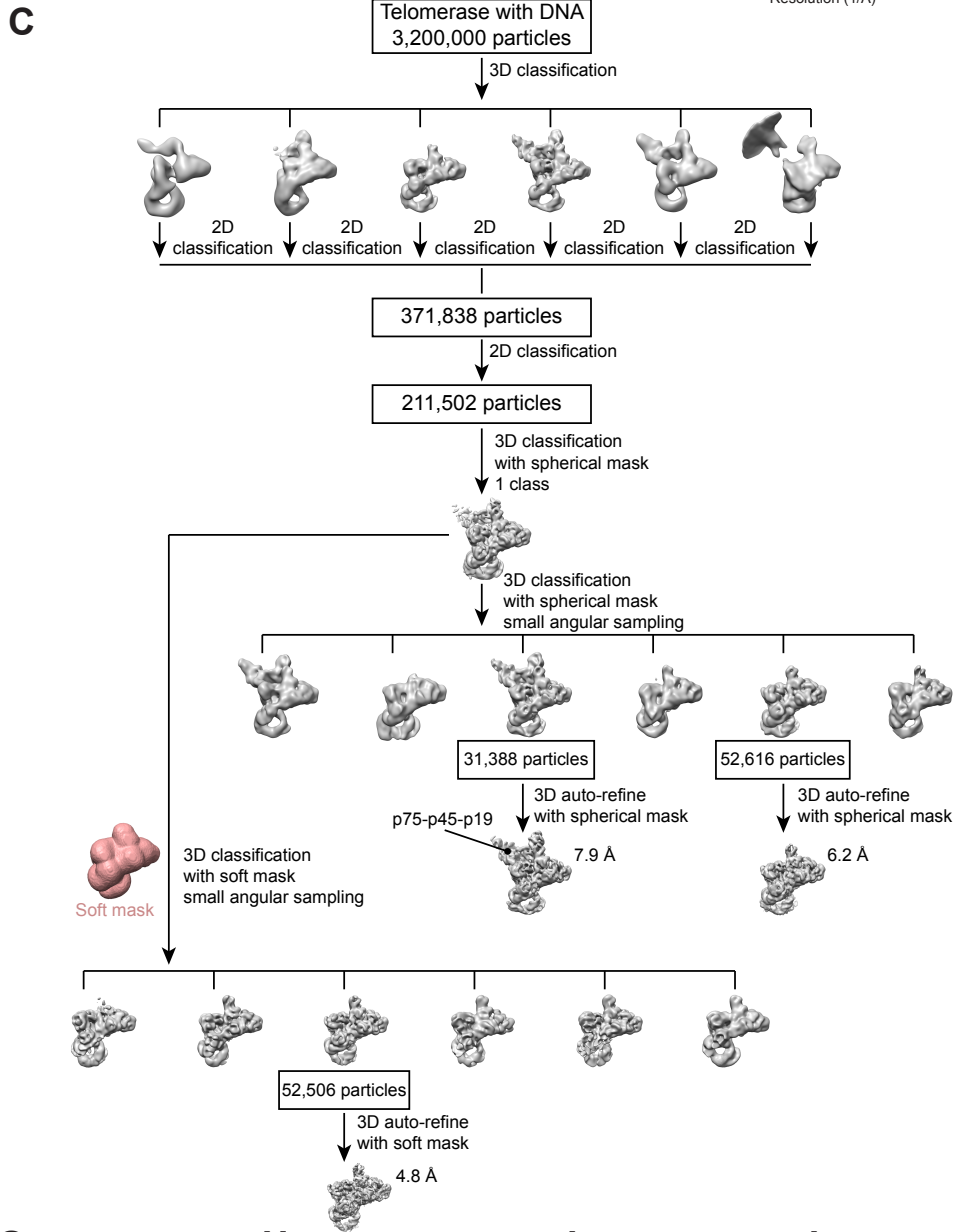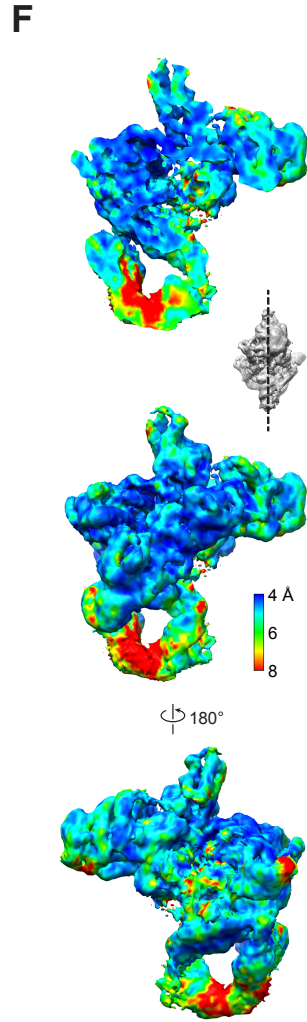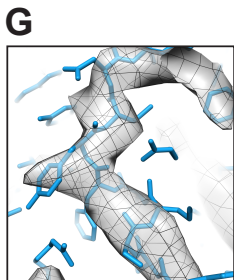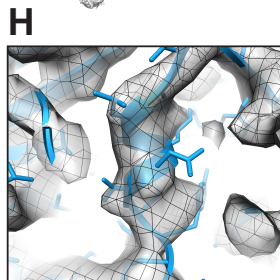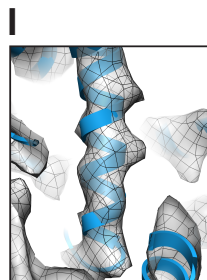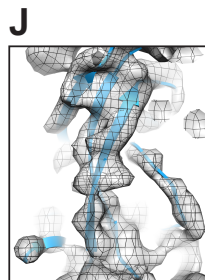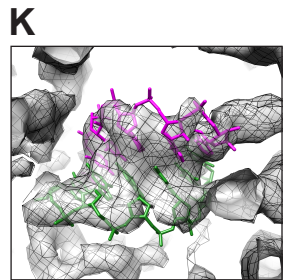

Supplement: NIHMS969081-supplement-2.pdf [file NIHMS969081-supplement-2.pdf]

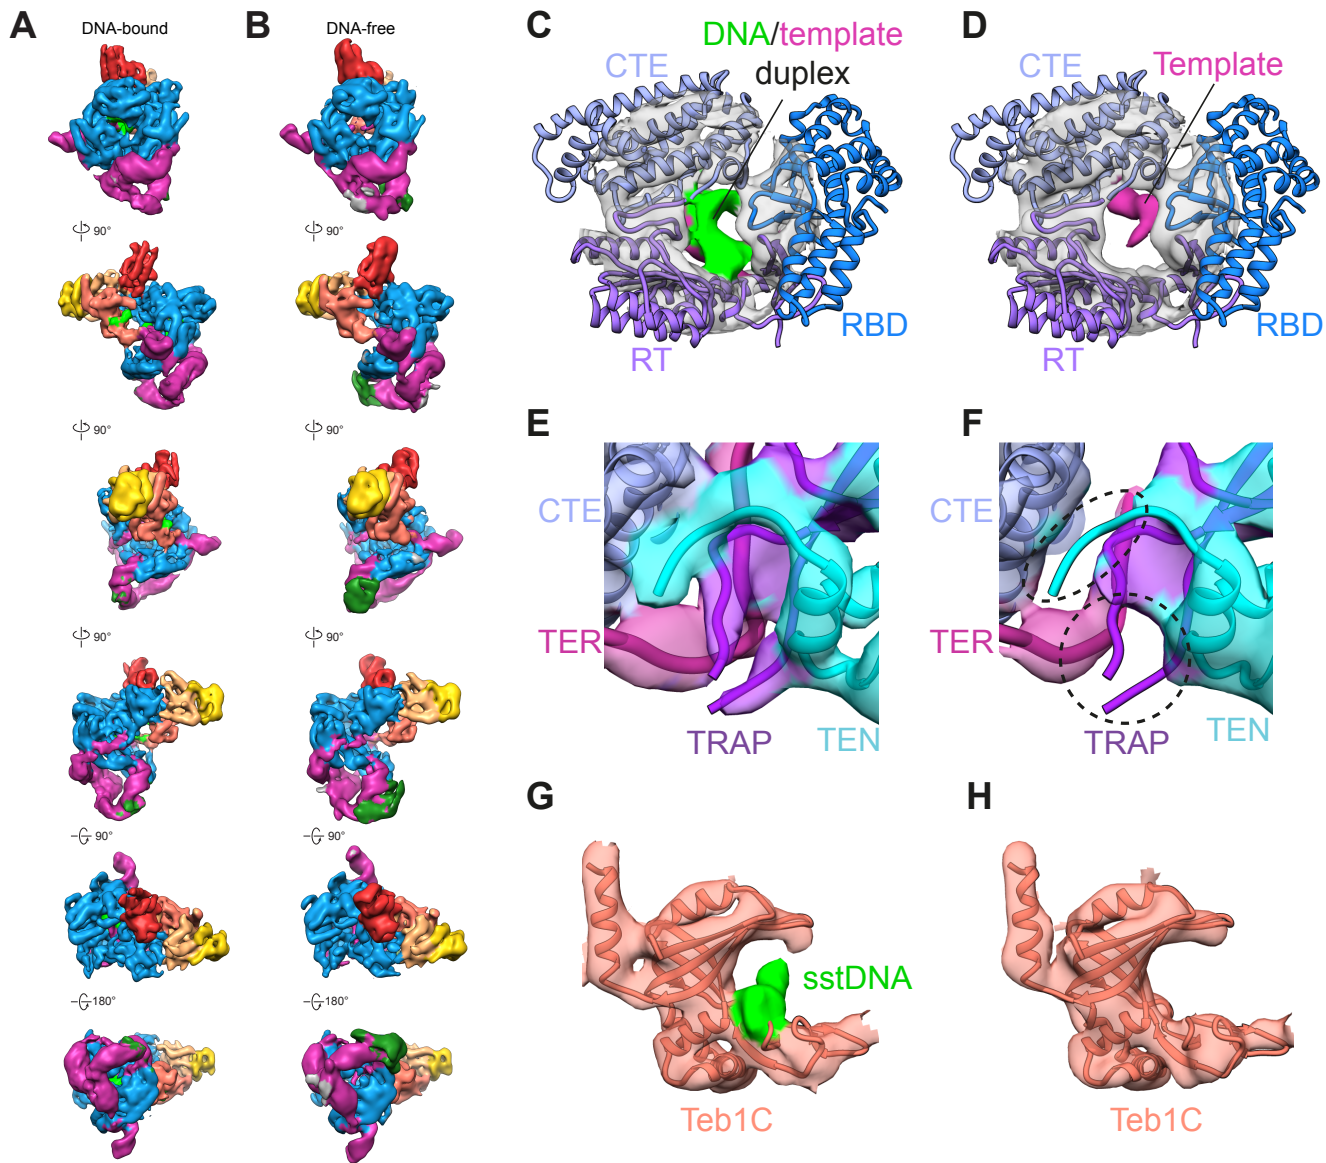

Supplement: NIHMS969081-supplement-3.pdf [file NIHMS969081-supplement-3.pdf]

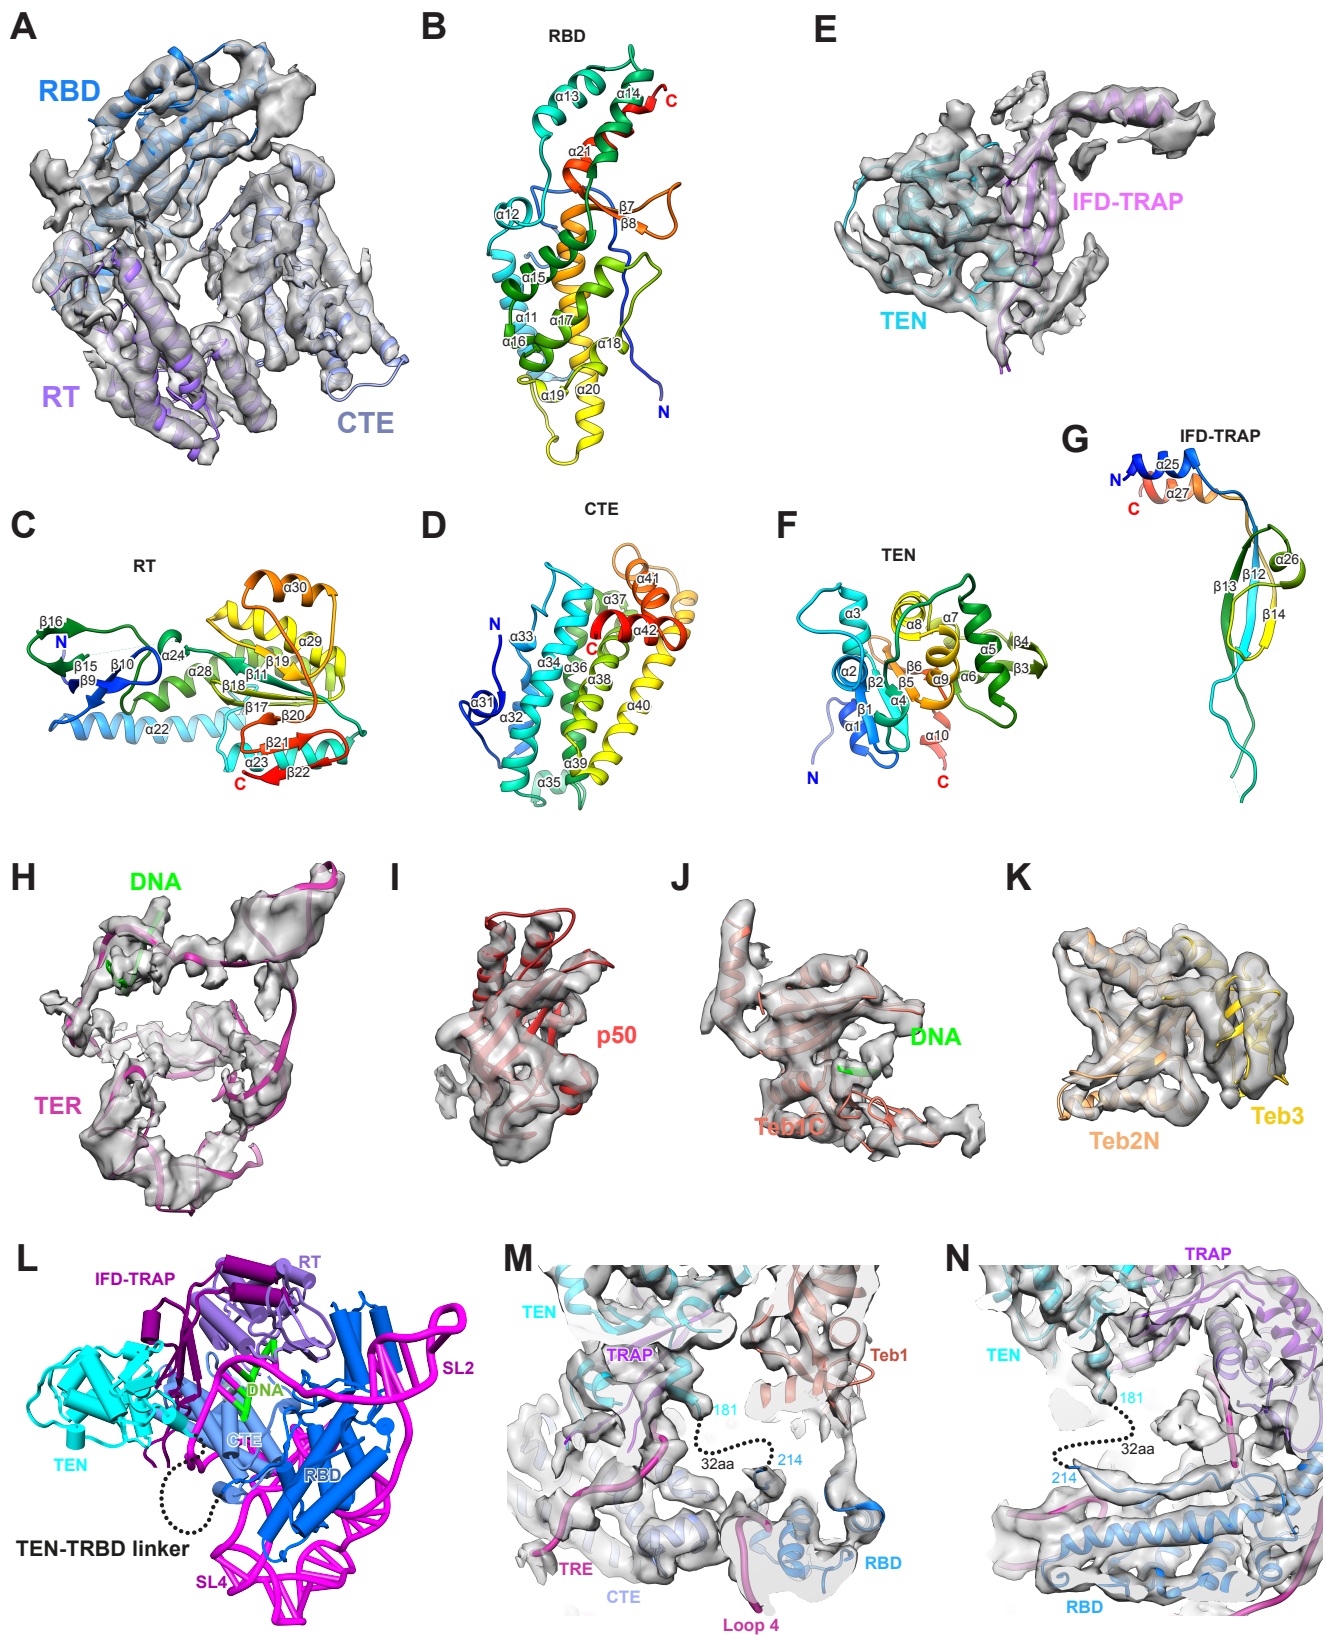

Supplement: NIHMS969081-supplement-4.pdf [file NIHMS969081-supplement-4.pdf]

**A**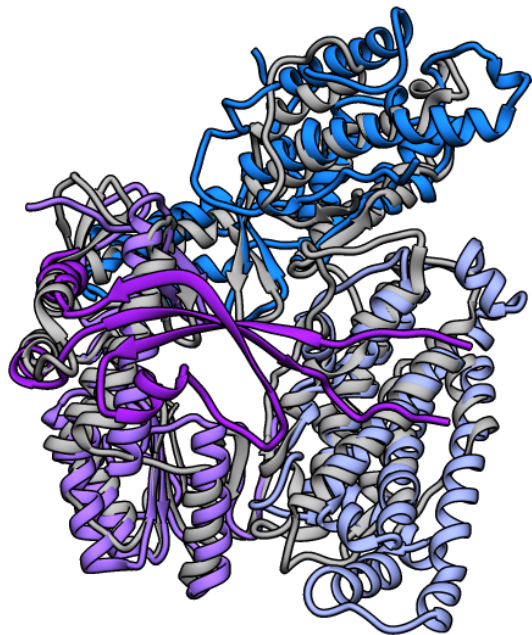**B**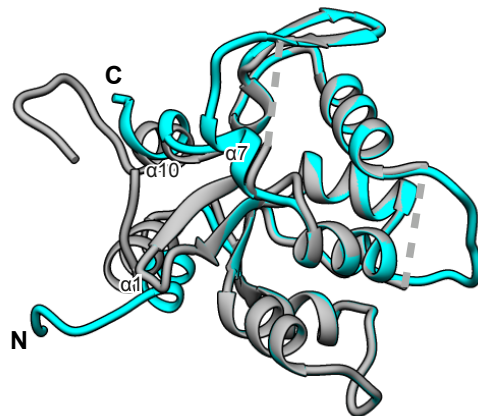**C**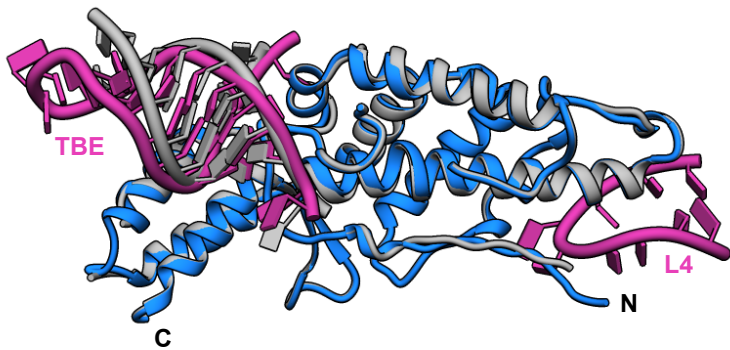**D**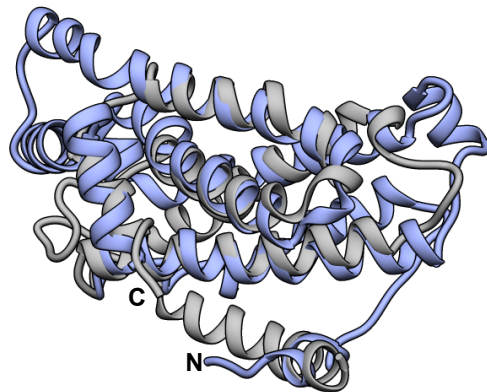

Supplement: NIHMS969081-supplement-5.pdf [file NIHMS969081-supplement-5.pdf]

**A**

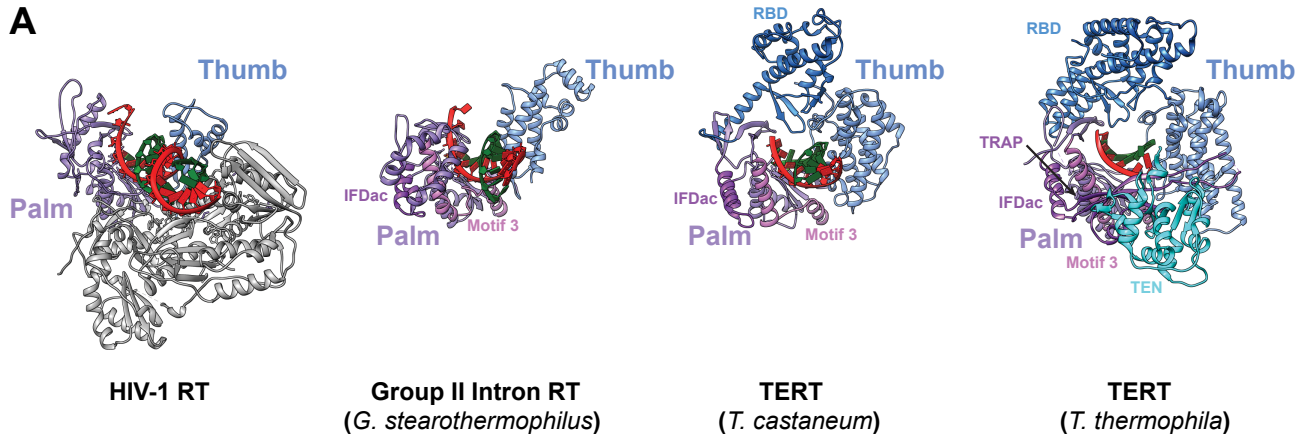

**B**

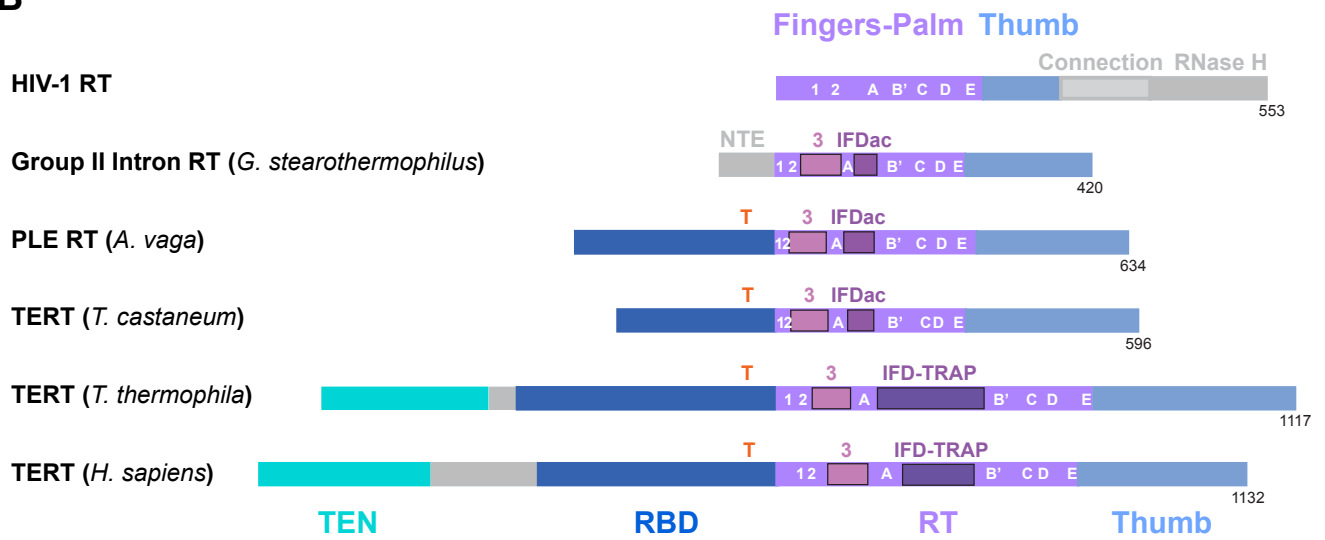

Supplement: NIHMS969081-supplement-6.pdf [file NIHMS969081-supplement-6.pdf]
